# Supplementary material for: Effects of threshold on the topology of gene co-expression networks
Source: Royal Society of Chemistry journal article supplement (doi:10.1039/c7mb00101k), 2017-07-21
Supplement: c7mb00101k1.pdf [file c7mb00101k1.pdf]

**Table S1** Studied datasets and their respective access numbers and references. The last column of the table indicates the groups (e.g., control, condition 1, condition 2) belonging to each dataset.

|                               | Access number | Ref. (Code)        | Data size                   | Classes                                                                                                                |
|-------------------------------|---------------|--------------------|-----------------------------|------------------------------------------------------------------------------------------------------------------------|
| Bone matrix                   | GDS928        | <sup>70</sup> (B1) | 10499 genes and 6 replica   | control (1), temporal groups 1, 2, 3, 4, 5 (5)                                                                         |
|                               | E-MEXP-1618   | <sup>62</sup> (B2) | 54675 genes and 84 replica  | group 1 (84)                                                                                                           |
|                               | GSE30322      | <sup>77</sup> (B3) | 24747 genes and 31 replica  | temporal group 1 (5) and control 1 (5), temporal group 2 (5) and control 2 (5), temporal group 3 (5) and control 3 (5) |
|                               | GSE47552      | <sup>76</sup> (B4) | 33297 genes and 99 replica  | control (5), group 1 (41), group 2 (33), group 3 (20)                                                                  |
| Cancer cells                  | GDS5059       | <sup>63</sup> (C1) | 54675 genes and 30 replica  | temporal group 1 (8) and control (2), temporal group 2 (8) and control (2), temporal group 3 (8) and control (2)       |
|                               | GDS5071       | <sup>71</sup> (C2) | 33297 genes and 13 replica  | control (6), group 1 (7)                                                                                               |
|                               | GDS5010       | <sup>59</sup> (C3) | 45101 genes and 18 replica  | control 1 (3) and group 1 (3), control 2 (3) and group 2 (3), control 3 (3) and group 3 (3)                            |
|                               | GDS5070       | <sup>60</sup> (C4) | 54675 genes and 12 replica  | control 1 (3) and group 1 (3), control 2 (3) and group 2 (3)                                                           |
|                               | GSE45016      | <sup>65</sup> (C5) | 54675 genes and 11 replica  | control (1), group 1 (10)                                                                                              |
| <i>Drosophila</i> development | GSE9149       | <sup>83</sup> (D1) | 14010 genes and 29 replica  | group 1 (6), group 2 (6), group 3 (6), group 4 (6), group 5 (5)                                                        |
|                               | GSE35240      | <sup>66</sup> (D2) | 18952 genes and 15 replica  | control 1 (3), control 2 (3), group 1 (3), group 2 (3), group                                                          |
|                               | GSE31564      | <sup>78</sup> (D3) | 18952 genes and 24 replica  | 2 controls (3) and 6 temporal groups (3)                                                                               |
|                               | GSE18208      | <sup>69</sup> (D4) | 18952 genes and 16 replica  | control (2), group 1 (7), group 2 (7)                                                                                  |
|                               | GSE34400      | <sup>67</sup> (D5) | 18952 genes and 44 replica  | control (6), group 1 (38)                                                                                              |
| Neuron cells                  | GSE28146      | <sup>61</sup> (N1) | 54657 genes and 30 replica  | control (7), group 1 (7), group 2 (8), group 3 (8)                                                                     |
|                               | GSE43578      | <sup>72</sup> (N2) | 35557 genes and 18 replica  | control 1 (5), group 1 (4), control 2 (3), group 2 (6)                                                                 |
| Plant cells                   | GDS2895       | <sup>74</sup> (P1) | 28800 genes and 20 replica  | group 1 (4), group 2 (4), group 3 (4), group 4 (4), group 5 (4)                                                        |
|                               | GSE14304      | <sup>68</sup> (P2) | 42537 genes and 16 replica  | group 1 (2), group 2 (2), group 3 (2), group 4 (2), group 5 (2), group 6 (2), group 7 (2), group 8 (2)                 |
|                               | GSE14304      | <sup>68</sup> (P3) | 57381 genes and 98 replica  | group 1 (98)                                                                                                           |
|                               | GDS2114       | <sup>73</sup> (P4) | 22810 genes and 12 replica  | control 1 (1) and group 1(3), control 2 (1) and group 2 (3), control 3 (1) and group 3 (3)                             |
|                               | GDS3244       | <sup>64</sup> (P5) | 61170 genes and 160 replica | 40 groups (4)                                                                                                          |

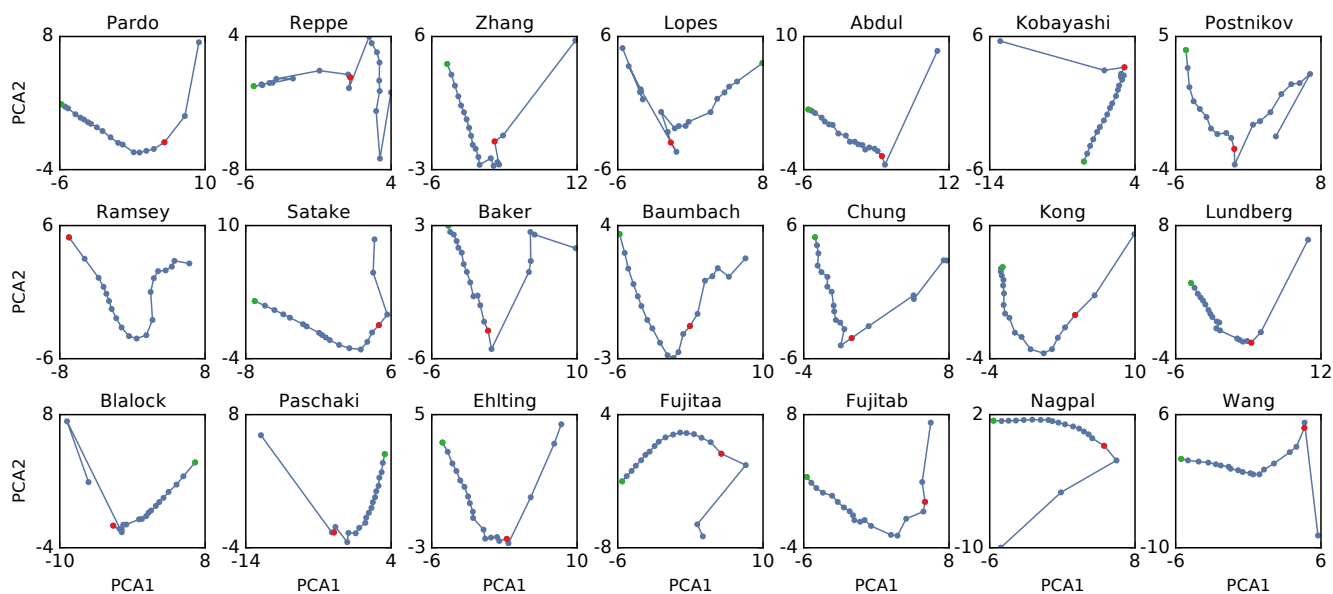

**Fig. S1** PCA projections of network properties obtained using distinct threshold values. The name on the top of each plot corresponds to the first author of the dataset were the networks were generated. Green dots indicate the network corresponding to the lowest threshold. Red dots indicate the detected transition from stable to unstable properties.

**Table S2** Absolute Pearson correlation coefficients obtained for the relationships between node strength (sum of edge weights) and degree. Green cells indicate values larger than 0.5.

|           | T variation | T entropy | T comp. 0.4 | T comp. 0.6 | T comp. 0.8 | T deg. 100 | T deg. 1000 | T power-law |
|-----------|-------------|-----------|-------------|-------------|-------------|------------|-------------|-------------|
| Pardo     | 0.65        | 0.65      | 0.31        | 0.47        | 0.47        | 0.75       | 0.93        | 0.31        |
| Reppe     | 0.16        | 0.63      | 0.41        | 0.58        | 0.77        | 0.46       | 0.84        | 0.70        |
| Zhang     | 0.08        | 0.65      | 0.36        | 0.50        | 0.61        | 0.61       | 0.87        | 0.58        |
| Lopes     | 0.06        | 0.82      | 0.52        | 0.64        | 0.75        | 0.53       | 0.82        | 0.33        |
| Abdul     | 0.19        | 0.89      | 0.62        | 0.77        | 0.84        | 0.51       | 0.75        | 0.28        |
| Kobayashi | 0.28        | 0.70      | 0.50        | 0.56        | 0.61        | 0.62       | 0.81        | 0.67        |
| Postnikov | 0.34        | 0.65      | 0.43        | 0.51        | 0.55        | 0.67       | 0.91        | 0.91        |
| Ramsey    | 0.84        | 0.73      | 0.57        | 0.64        | 0.66        | 0.50       | 0.73        | 0.44        |
| Satake    | 0.13        | 0.30      | 0.16        | 0.19        | 0.22        | 0.40       | 0.77        | 0.15        |
| Baker     | 0.51        | 0.55      | 0.40        | 0.46        | 0.64        | 0.31       | 0.60        | 0.42        |
| Baumbach  | 0.77        | 0.83      | 0.72        | 0.77        | 0.80        | 0.70       | 0.80        | 0.80        |
| Chung     | 0.62        | 0.22      | 0.61        | 0.60        | 0.43        | 0.30       | 0.94        | 0.82        |
| Kong      | 0.56        | 0.53      | 0.63        | 0.78        | 0.83        | 0.51       | 0.78        | 0.58        |
| Lundberg  | 0.11        | 0.92      | 0.61        | 0.78        | 0.87        | 0.67       | 0.92        | 0.78        |
| Blalock   | 0.09        | 0.59      | 0.38        | 0.42        | 0.46        | 0.60       | 0.89        | 0.71        |
| Paschaki  | 0.13        | 0.63      | 0.41        | 0.51        | 0.59        | 0.61       | 0.86        | 0.68        |
| Ehltting  | 0.20        | 0.75      | 0.49        | 0.57        | 0.64        | 0.67       | 0.90        | 0.76        |
| Fujitaa   | 0.42        | 0.49      | 0.38        | 0.42        | 0.53        | 0.35       | 0.66        | 0.29        |
| Fujitab   | 0.00        | 0.16      | 0.07        | 0.03        | 0.12        | 0.07       | 0.55        | 0.07        |
| Nagpal    | 0.34        | 0.71      | 0.44        | 0.56        | 0.63        | 0.69       | 0.90        | 0.58        |
| Wang      | 0.10        | 0.72      | 0.60        | 0.77        | 0.89        | 0.53       | 0.76        | 0.38        |

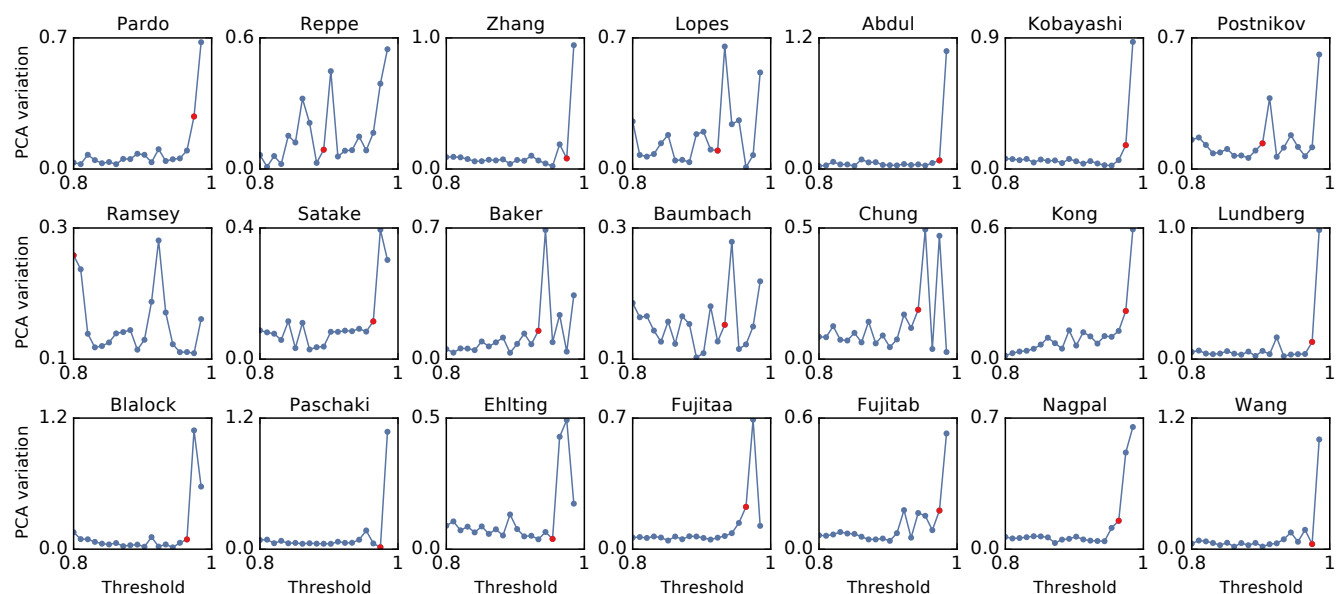

**Fig. S2** Variation among consecutive PCA points from Figure S1. The name on the top of each plot corresponds to the first author of the dataset were the networks were generated. Red dots indicate the detected transition from stable to unstable properties.

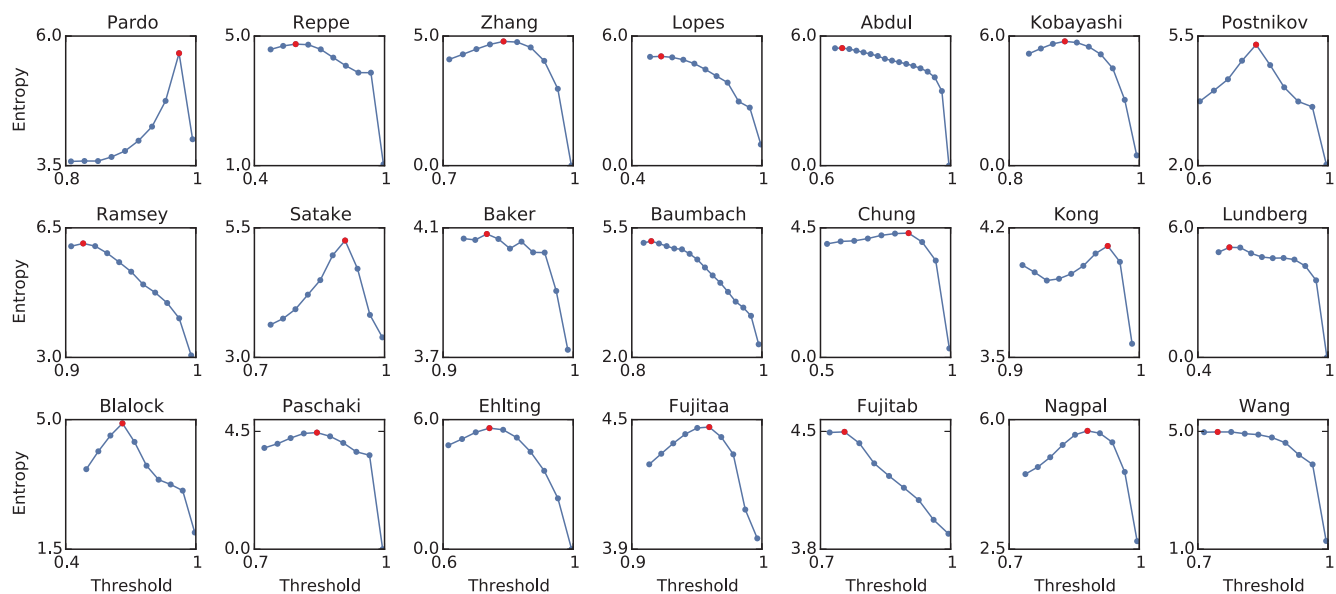

**Fig. S3** Entropy values obtained for networks generated by different threshold values. Red dots indicate the maximum entropy reached by each dataset.

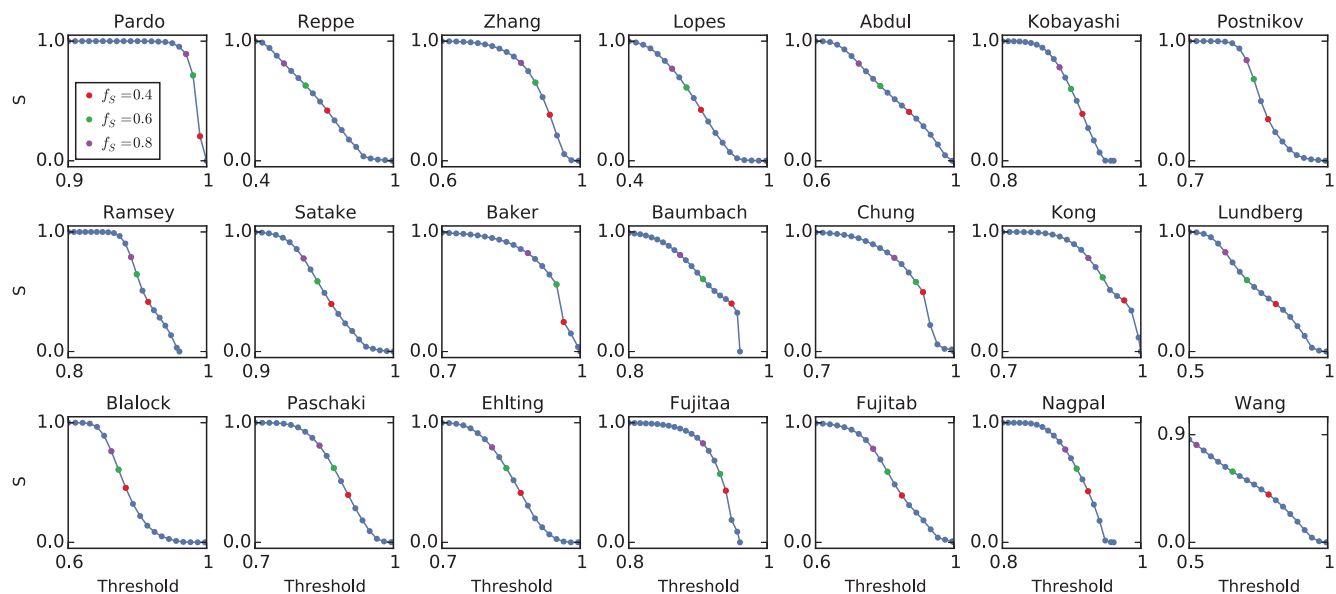

**Fig. S4** Network's giant component size as a function of threshold. The size is normalized by the total number of genes studied in each experiment. Colored dots indicate the giant component sizes used in the analysis, represented as  $f_s$ .

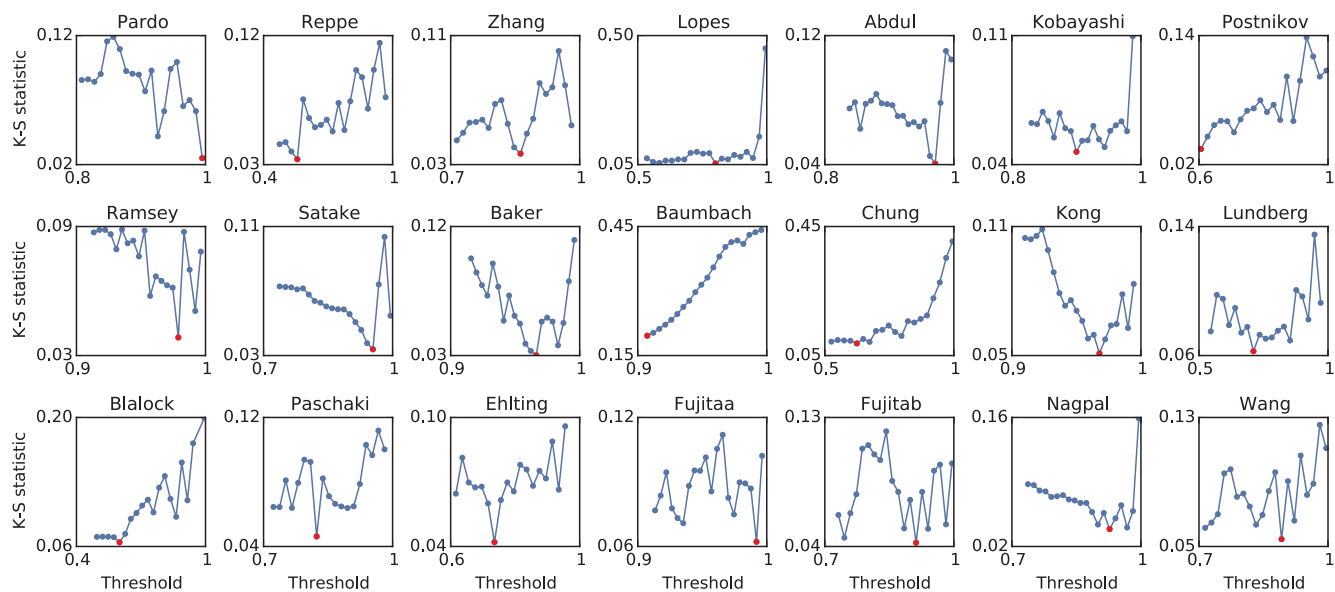

**Fig. S5** Kolmogorov-Smirnov statistic comparing the degree distribution of the networks to a power-law function.

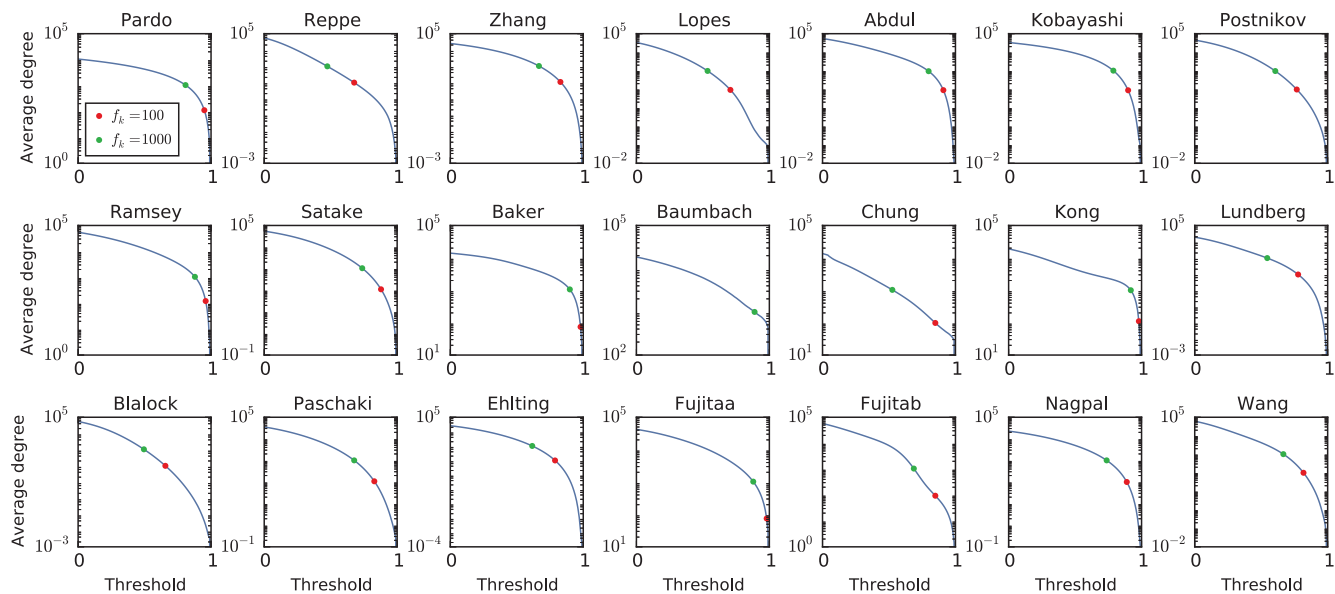

**Fig. S6** Average degree of the networks obtained by different thresholds. The dots indicate the chosen average degree for analyzing this criterion, represented as  $f_k$ .

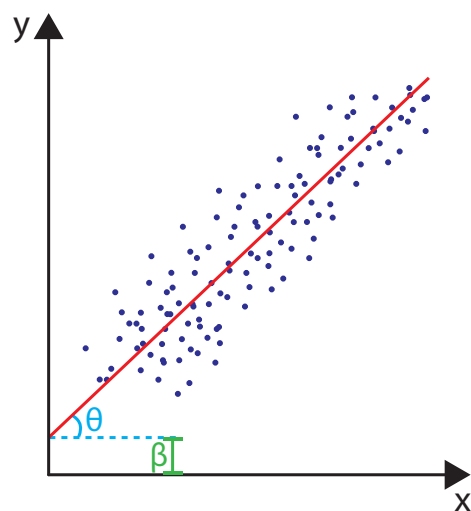

**Fig. S7** Meaning of the angular ( $\alpha$ ) and linear ( $\beta$ ) coefficients. The red line represents a linear regression of the blue points.  $\beta$  is given by the y value where the red line intercepts the y axis.  $\theta$  is the angle between the red line and the x axis.  $\alpha$  is calculated as  $\alpha = \tan(\theta)$ .



**Table S4** Pearson correlation values between the methods shown in Figure S8.

|             | T variation | T entropy | T comp 0.4 | T comp 0.6 | T comp 0.8 | T deg. 100 | T deg. 1000 | T power-law |
|-------------|-------------|-----------|------------|------------|------------|------------|-------------|-------------|
| T variation | 1           | 0.05      | 0.09       | 0.05       | 0.02       | 0.02       | -0.03       | 0.14        |
| T entropy   | 0.05        | 1         | 0.92       | 0.93       | 0.90       | 0.80       | 0.75        | 0.61        |
| T comp 0.4  | 0.09        | 0.92      | 1          | 0.97       | 0.93       | 0.89       | 0.79        | 0.64        |
| T comp 0.6  | 0.05        | 0.93      | 0.97       | 1          | 0.99       | 0.80       | 0.71        | 0.56        |
| T comp 0.8  | 0.02        | 0.90      | 0.93       | 0.99       | 1          | 0.73       | 0.66        | 0.51        |
| T deg. 100  | 0.02        | 0.80      | 0.89       | 0.80       | 0.73       | 1          | 0.95        | 0.83        |
| T deg. 1000 | -0.03       | 0.75      | 0.79       | 0.71       | 0.66       | 0.95       | 1           | 0.88        |
| T power-law | 0.14        | 0.61      | 0.64       | 0.56       | 0.51       | 0.83       | 0.88        | 1           |

**Table S5** Alpha values ( $\tilde{\alpha}$ ) for the methods shown in Figure S8.

|             | T variation | T entropy | T comp. 0.4 | T comp. 0.6 | T comp. 0.8 | T deg. 100 | T deg. 1000 | T power-law |
|-------------|-------------|-----------|-------------|-------------|-------------|------------|-------------|-------------|
| T variation | 1.00        | 0.02      | 0.04        | 0.02        | 0.01        | 0.01       | -0.01       | 0.04        |
| T entropy   | 0.16        | 1.00      | 1.39        | 1.09        | 0.87        | 1.06       | 0.70        | 0.57        |
| T comp. 0.4 | 0.19        | 0.60      | 1.00        | 0.75        | 0.60        | 0.77       | 0.48        | 0.39        |
| T comp. 0.6 | 0.12        | 0.78      | 1.25        | 1.00        | 0.81        | 0.89       | 0.56        | 0.45        |
| T comp. 0.8 | 0.06        | 0.93      | 1.47        | 1.20        | 1.00        | 0.99       | 0.63        | 0.50        |
| T deg. 100  | 0.04        | 0.61      | 1.02        | 0.71        | 0.53        | 1.00       | 0.67        | 0.59        |
| T deg. 1000 | -0.10       | 0.81      | 1.29        | 0.90        | 0.69        | 1.34       | 1.00        | 0.88        |
| T power-law | 0.49        | 0.65      | 1.04        | 0.71        | 0.53        | 1.17       | 0.87        | 1.00        |

**Table S6** Beta values ( $\tilde{\beta}$ ) for the methods shown in Figure S8.

|             | T variation | T entropy | T comp. 0.4 | T comp. 0.6 | T comp. 0.8 | T deg. 100 | T deg. 1000 | T power-law |
|-------------|-------------|-----------|-------------|-------------|-------------|------------|-------------|-------------|
| T variation | 0.00        | 0.94      | 0.91        | 0.93        | 0.94        | 0.94       | 0.95        | 0.91        |
| T entropy   | 0.64        | 0.00      | -0.45       | -0.13       | 0.09        | -0.11      | 0.30        | 0.31        |
| T comp. 0.4 | 0.71        | 0.41      | 0.00        | 0.25        | 0.41        | 0.23       | 0.55        | 0.56        |
| T comp. 0.6 | 0.73        | 0.22      | -0.27       | 0.00        | 0.19        | 0.08       | 0.45        | 0.47        |
| T comp. 0.8 | 0.75        | 0.07      | -0.50       | -0.21       | -0.00       | -0.04      | 0.35        | 0.39        |
| T deg. 100  | 0.82        | 0.38      | -0.05       | 0.25        | 0.43        | 0.00       | 0.38        | 0.36        |
| T deg. 1000 | 0.80        | 0.07      | -0.44       | -0.06       | 0.16        | -0.44      | -0.00       | -0.03       |
| T power-law | 0.38        | 0.32      | -0.09       | 0.23        | 0.41        | -0.17      | 0.22        | 0.00        |

**Table S7** Chosen thresholds by the different criteria for each experiment.

|           | T variation | T entropy | T comp. 0.4 | T comp. 0.6 | T comp. 0.8 | T deg. 100 | T deg. 1000 | T power-law |
|-----------|-------------|-----------|-------------|-------------|-------------|------------|-------------|-------------|
| Pardo     | 0.974       | 0.974     | 0.995       | 0.990       | 0.990       | 0.949      | 0.808       | 0.995       |
| Reppe     | 0.892       | 0.590     | 0.711       | 0.616       | 0.521       | 0.677      | 0.475       | 0.557       |
| Zhang     | 0.974       | 0.813     | 0.911       | 0.869       | 0.827       | 0.828      | 0.667       | 0.839       |
| Lopes     | 0.923       | 0.535     | 0.711       | 0.648       | 0.584       | 0.707      | 0.535       | 0.801       |
| Abdul     | 0.974       | 0.667     | 0.869       | 0.784       | 0.721       | 0.909      | 0.798       | 0.964       |
| Kobayashi | 0.974       | 0.857     | 0.942       | 0.921       | 0.900       | 0.899      | 0.788       | 0.875       |
| Postnikov | 0.903       | 0.779     | 0.869       | 0.837       | 0.821       | 0.768      | 0.606       | 0.606       |
| Ramsey    | 0.800       | 0.879     | 0.942       | 0.921       | 0.911       | 0.960      | 0.879       | 0.971       |
| Satake    | 0.964       | 0.909     | 0.953       | 0.942       | 0.932       | 0.879      | 0.737       | 0.954       |
| Baker     | 0.933       | 0.920     | 0.963       | 0.948       | 0.884       | 0.980      | 0.899       | 0.960       |
| Baumbach  | 0.933       | 0.830     | 0.984       | 0.932       | 0.890       | 0.990      | 0.889       | 0.889       |
| Chung     | 0.944       | 0.838     | 0.932       | 0.916       | 0.869       | 0.848      | 0.525       | 0.624       |
| Kong      | 0.974       | 0.978     | 0.963       | 0.916       | 0.884       | 0.980      | 0.919       | 0.971       |
| Lundberg  | 0.974       | 0.545     | 0.811       | 0.706       | 0.627       | 0.778      | 0.545       | 0.711       |
| Blalock   | 0.964       | 0.662     | 0.763       | 0.742       | 0.721       | 0.657      | 0.495       | 0.600       |
| Paschaki  | 0.974       | 0.818     | 0.900       | 0.869       | 0.837       | 0.828      | 0.677       | 0.794       |
| Ehltling  | 0.954       | 0.742     | 0.869       | 0.837       | 0.806       | 0.788      | 0.616       | 0.736       |
| Fujitaa   | 0.964       | 0.943     | 0.974       | 0.963       | 0.932       | 0.980      | 0.879       | 0.989       |
| Fujitab   | 0.974       | 0.755     | 0.848       | 0.806       | 0.763       | 0.848      | 0.687       | 0.898       |
| Nagpal    | 0.964       | 0.880     | 0.953       | 0.932       | 0.911       | 0.889      | 0.737       | 0.927       |
| Wang      | 0.974       | 0.703     | 0.784       | 0.653       | 0.521       | 0.818      | 0.667       | 0.874       |



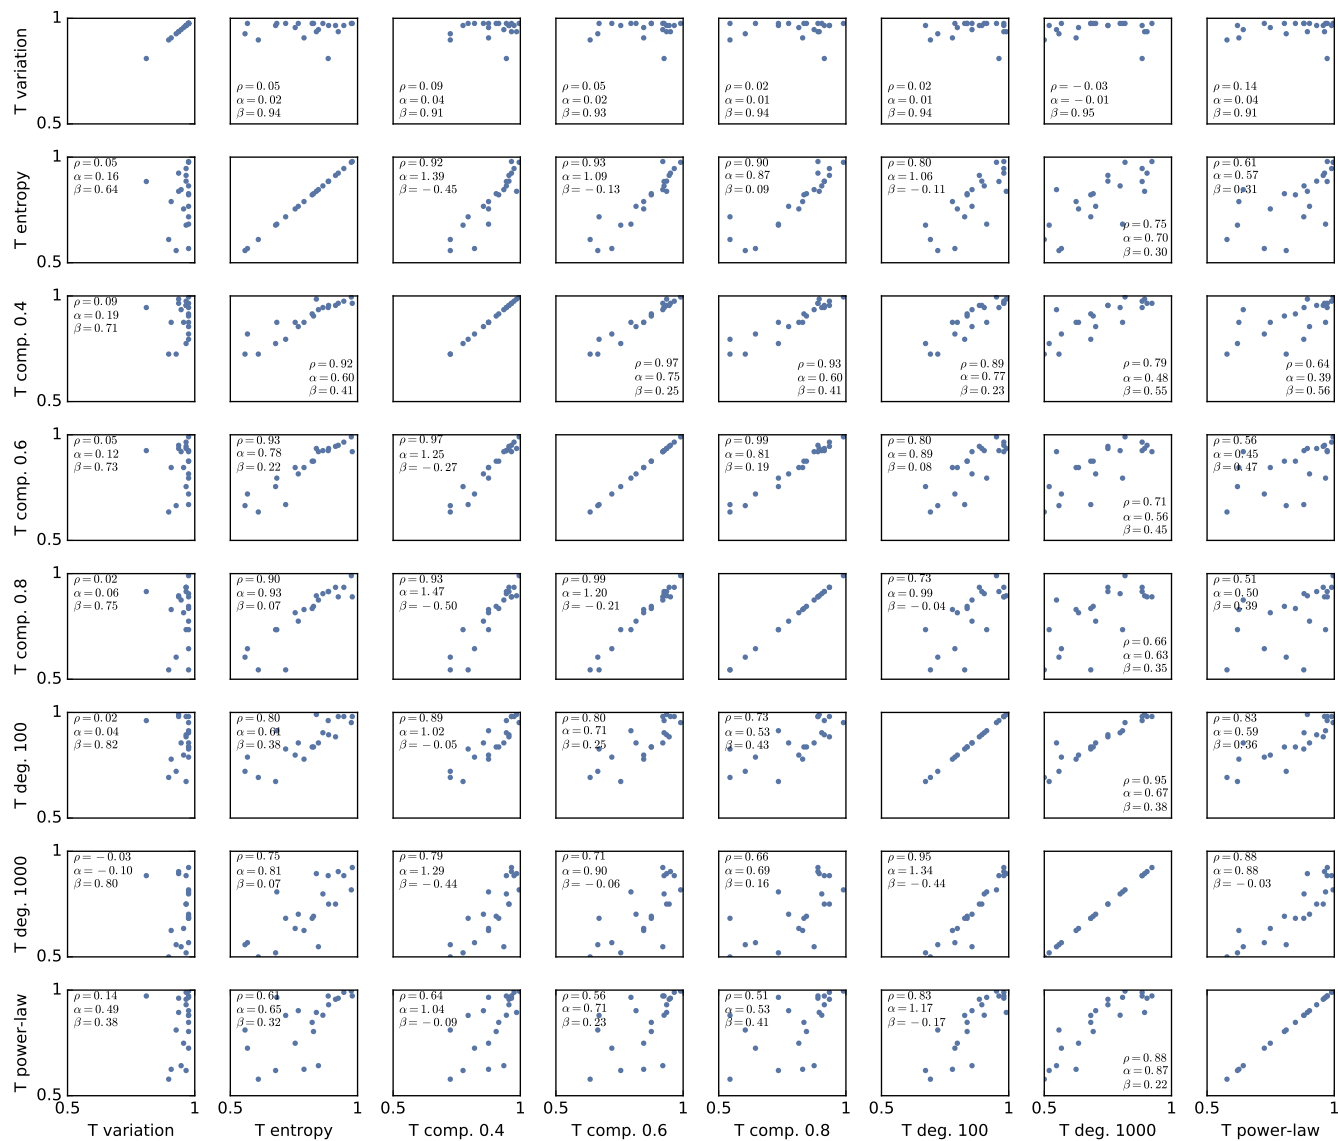

**Fig. S8** Scatter plots between the threshold values chosen by different criteria. Each point corresponds to a dataset. Please refer to the main text for the meaning of the axes names.  $\rho$  indicates the Pearson correlation coefficient between the plotted values,  $\alpha$  indicates the angular coefficient, and  $\beta$  the linear coefficient of a straight line least squares fit of the data.

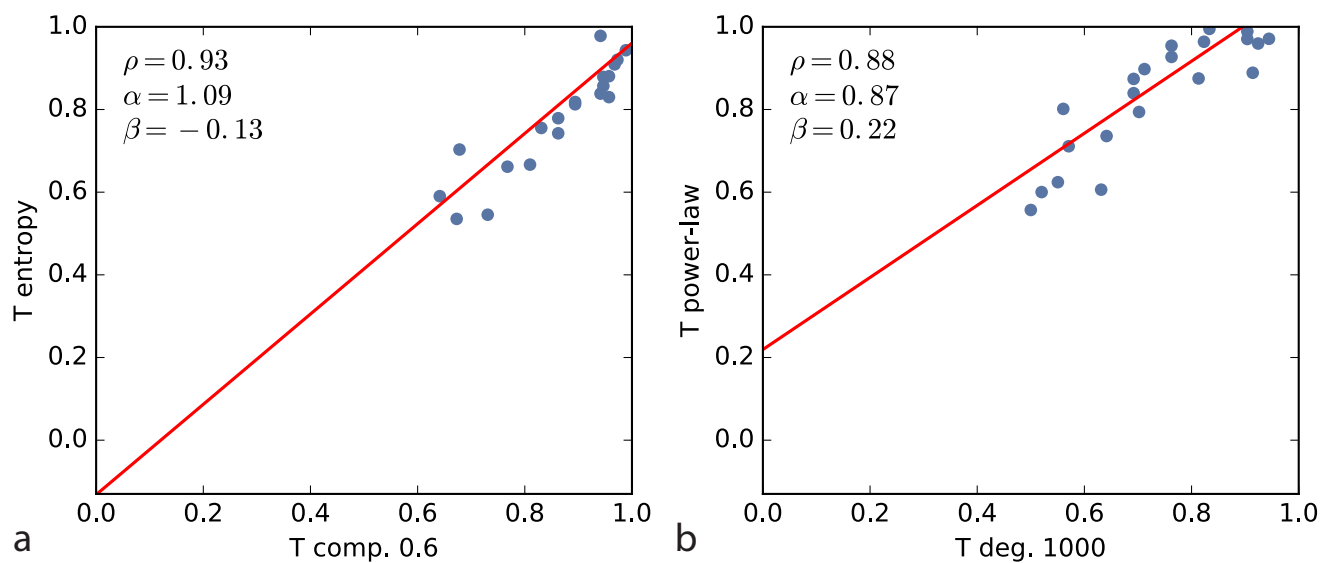

**Fig. S9** Correlation between criteria: entropy versus component 60% (a), and power-law versus average degree 1000 (b).  $\rho$  corresponds to the Pearson correlation coefficient,  $\alpha$  to the angular coefficient and  $\beta$  to the linear coefficient. The red line indicates the best straight line fit using least squares.

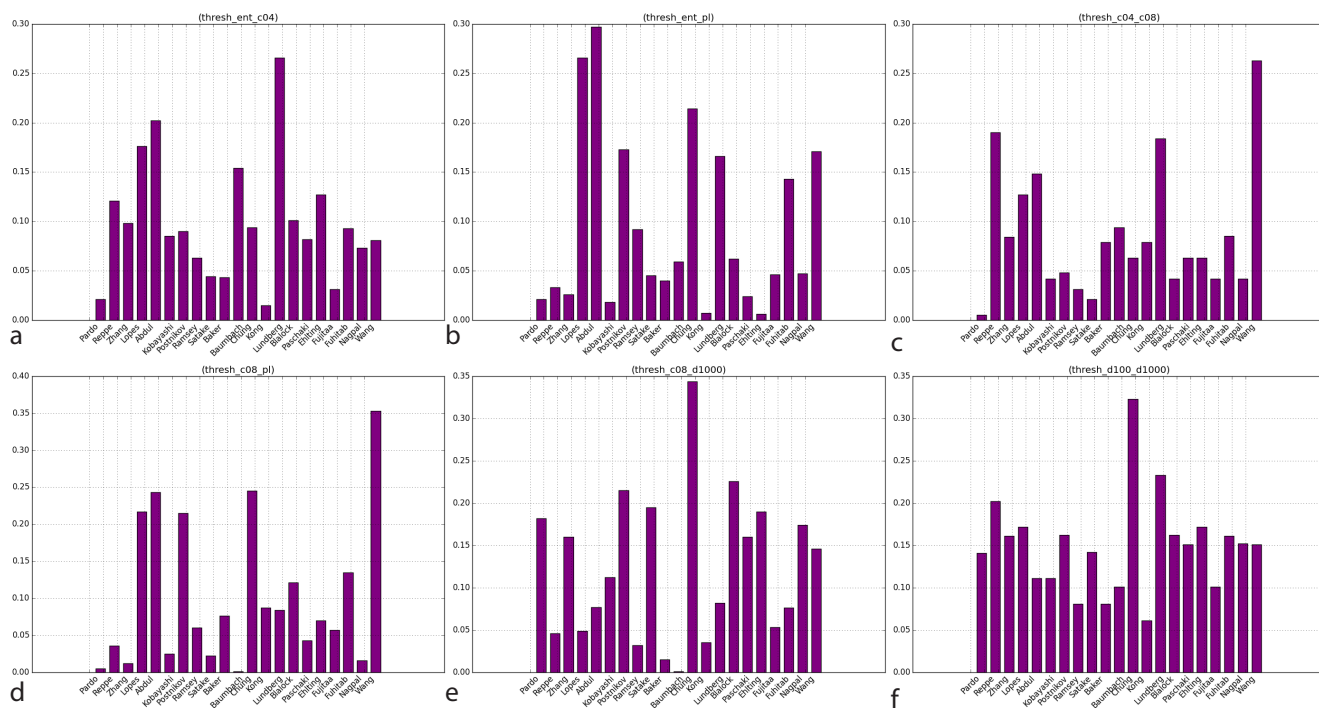

**Fig. S10** Difference between the threshold values chosen by two criteria. This comparison considered the criteria that had the largest divergences in Figure 9. (a) entropy X component 40%, (b) entropy X power-law, (c) component 40% X component 80%, (d) component 80% X power-law, (e) component 80% X average degree 1000, (f) average degree 1000 X average degree 100.
